# Supplementary material
Source: Springer Nature journal article supplement (https://www.springermedizin.de/resource/supplementary/12890_2013_499_MOESM4_ESM.pdf/9505638)

**A**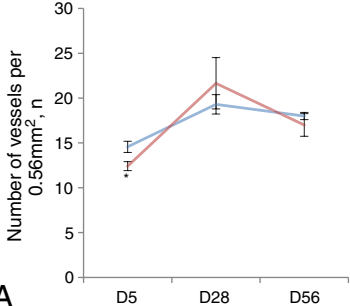**B**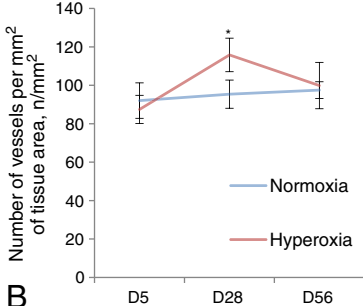

Supplement: MOESM4 [file 9505638]
